# Supplementary material for: Facile synthesis of composition-gradient Cd1−xZnxS quantum dots by cation exchange for controlled optical properties
Source: Royal Society of Chemistry journal article supplement (doi:10.1039/c4tc02795g), 2015-01-01
Supplement: c4tc02795g1.pdf [file c4tc02795g1.pdf]

## Electronic Supplementary Information

# Facile Synthesis of Composition-Gradient $\text{Cd}_{1-x}\text{Zn}_x\text{S}$ Quantum Dots by Cation Exchange for Controlled Optical Properties

Dayeon Choi, Ji-Young Pyo, Yeonho Kim, and Du-Jeon Jang\*

*Department of Chemistry, Seoul National University, NS60, Seoul 151-742, Korea*

E-mail: [djjang@snu.ac.kr](mailto:djjang@snu.ac.kr)

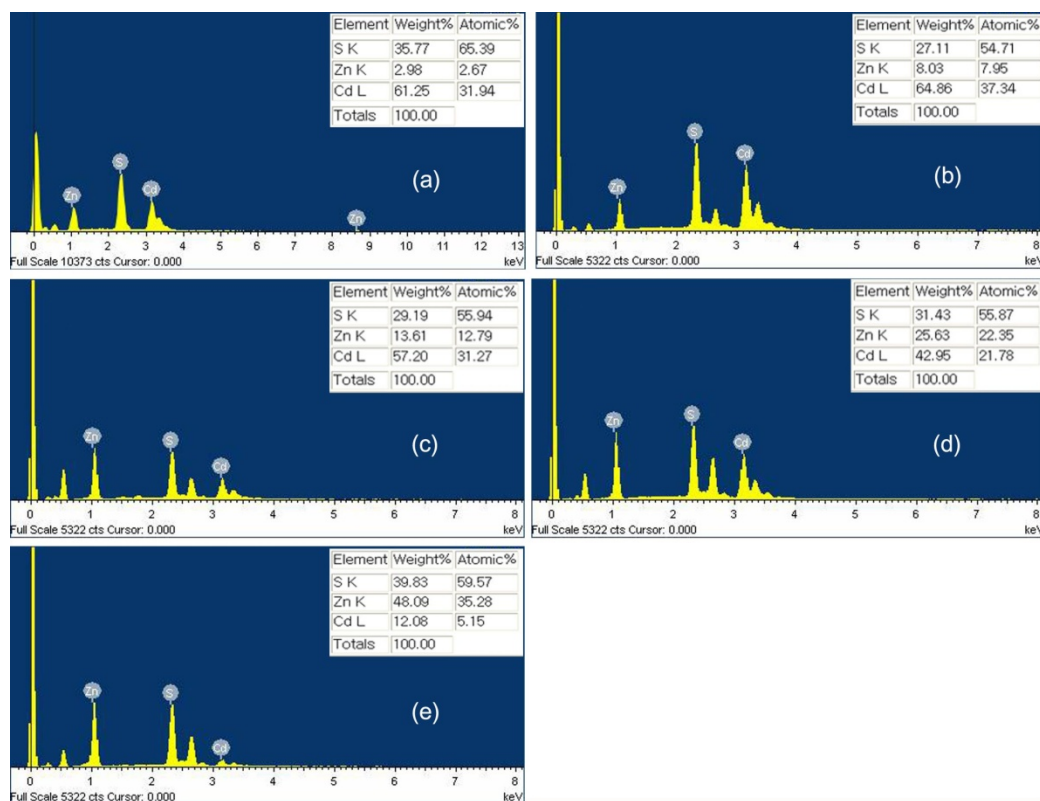

**Fig. S1** EDX spectra of (a) G-Cd<sub>0.92</sub>Zn<sub>0.08</sub>S, (b) G-Cd<sub>0.82</sub>Zn<sub>0.18</sub>S, (c) G-Cd<sub>0.71</sub>Zn<sub>0.29</sub>S, (d) G-Cd<sub>0.49</sub>Zn<sub>0.51</sub>S, and (e) G-Cd<sub>0.13</sub>Zn<sub>0.87</sub>S.

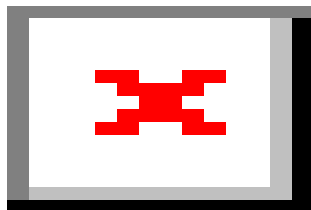

**Fig. S2** Variation of observed distances between adjacent (111) planes of G-Cd<sub>1-x</sub>Zn<sub>x</sub>S as a function of x; the standard distances between the (111) planes of cubic zinc-blende ZnS and CdS are indicated with crosses.

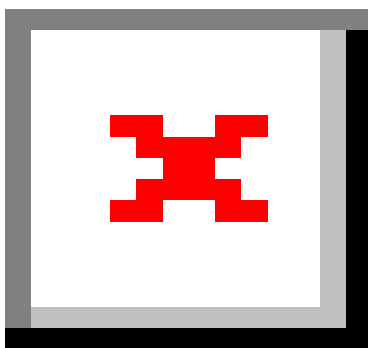

**Fig. S3** Maximum-normalized PL spectra of as-prepared G-Cd<sub>1-x</sub>Zn<sub>x</sub>S QDs dispersed in water, where x is indicated inside. The samples were excited at 355 nm, and the inset shows the  $\lambda_{\text{max}}$  of QDs versus x.

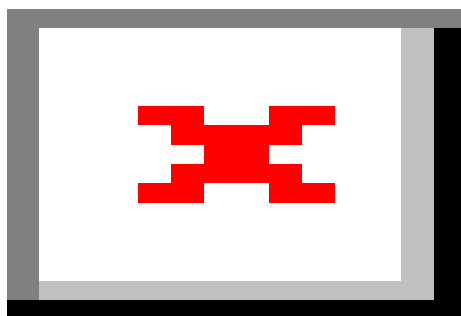

**Fig. S4** HRTEM images of (a) CdS, (b) G-Cd<sub>0.71</sub>Zn<sub>0.29</sub>S, (c) C-Cd<sub>0.68</sub>Zn<sub>0.32</sub>S, and (d) A-Cd<sub>0.74</sub>Zn<sub>0.26</sub>S.

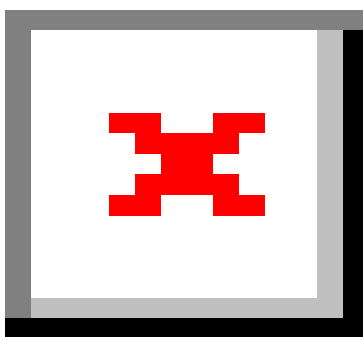

**Fig. S5** PL spectra of various indicated Cd<sub>1-x</sub>Zn<sub>x</sub>S QDs dispersed in water. The samples were excited at 355 nm. Note that the Cd<sup>2+</sup> concentration of the colloidal solution of G-Cd<sub>0.71</sub>Zn<sub>0.29</sub>S QDs has been calibrated to 5.0 mM as those of the other colloidal solutions.

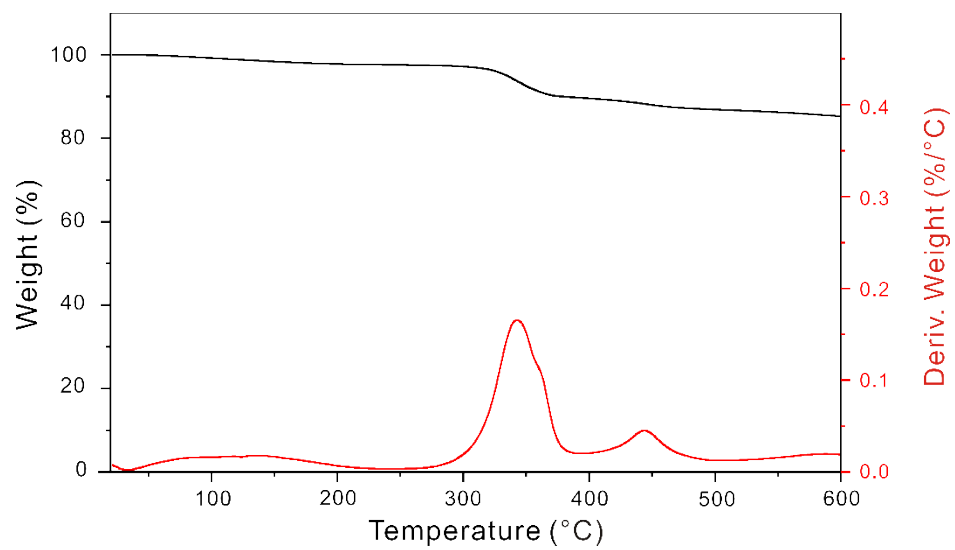

**Fig. S6** TGA(black) and DTA(red) curves of G-Cd<sub>0.71</sub>Zn<sub>0.29</sub>S QDs.
